# Supplementary material for: The Role of Gratitude in a Positive Psychology Group Intervention Program Implemented for Undergraduate Engineering Students
Source: MDPI journal article supplement (doi:10.3390/bs13060460), 2023-06-02
Supplement: s1 [file s1]

# Supplementary Material

## Supplementary Data

**Table S1.** Measures administration.

| Administration     | Pre-test<br>1 <sup>st</sup> week | 3 <sup>rd</sup> & 4 <sup>th</sup><br>session | Post-test<br>5 <sup>th</sup> week |               | Pre-test<br>1 <sup>st</sup> week | 3 <sup>rd</sup> & 4 <sup>th</sup><br>week | Post-test<br>5 <sup>th</sup> week |
|--------------------|----------------------------------|----------------------------------------------|-----------------------------------|---------------|----------------------------------|-------------------------------------------|-----------------------------------|
| Experimental group | mDES                             | GQ-6                                         | mDES                              | Control group | mDES                             | GQ-6                                      | mDES                              |
|                    | CD-RISC                          |                                              | CD-RISC                           |               | CD-RISC                          |                                           | CD-RISC                           |
|                    | SHS                              |                                              | SHS                               |               | SHS                              |                                           | SHS                               |
|                    | LOT-R                            |                                              | LOT-R                             |               | LOT-R                            |                                           | LOT-R                             |

Note: Pre-test: Pre-intervention, Post-test: Post-intervention, mDES: Differential Emotions Scale-modified, CD-RISC: Connor-Davidson Resilience Scale, SHS: Subjective Happiness Scale, LOT-R: Revised Life Orientation Test, GQ-6: Gratitude Questionnaire-six item form.

**Table S2.** Means, standard deviations, and pre and post-intervention between-groups and within-groups differences in gratitude.

| Variable           | Experimental group |           | Control group |           | Independent t-test |          |
|--------------------|--------------------|-----------|---------------|-----------|--------------------|----------|
|                    | <i>M</i>           | <i>SD</i> | <i>M</i>      | <i>SD</i> | <i>t</i>           | <i>p</i> |
| Pre-test gratitude | 5.09               | .88       | 4.98          | .78       | .54                | .59      |

  

|                     | Experimental group |           |               |          | Control group |           |               |          | Independent t-test |          |
|---------------------|--------------------|-----------|---------------|----------|---------------|-----------|---------------|----------|--------------------|----------|
|                     |                    |           | Paired t-test |          |               |           | Paired t-test |          |                    |          |
|                     | <i>M</i>           | <i>SD</i> | <i>t</i>      | <i>p</i> | <i>M</i>      | <i>SD</i> | <i>t</i>      | <i>p</i> | <i>t</i>           | <i>p</i> |
| Post-test gratitude | 5.53               | .98       | -3.39         | .002     | 4.88          | .85       | 1.14          | .26      | 2.98               | .004     |

Note: ns: non-significant, Pre-test: Pre-intervention, Post-test: Post-intervention, GQ-6: Gratitude Questionnaire-six item form.

**Table S3.** Correlations between gratitude and the other psychological variables and multivariate regression analysis.

| Predictive variable | Post-test outcome variables | <i>r</i> | <i>F</i> (1, 18) | $\eta_p^2$ | <i>p</i> |
|---------------------|-----------------------------|----------|------------------|------------|----------|
| Post-test gratitude | Positive emotions           | .60***   | 1.46             | .64        | .230     |
|                     | Negative emotions           | -.28ns   | 1.16             | .58        | .390     |

|                             |        |      |     |      |
|-----------------------------|--------|------|-----|------|
| Psychological<br>resilience | .63*** | 2.16 | .72 | .070 |
| Subjective<br>happiness     | .69*** | 3.45 | .81 | .009 |
| Optimism                    | .51**  | 2.47 | .75 | .042 |

Note: \*\*  $p < .01$ ; \*\*\*  $p < .001$ ; ns: non-significant; Post-test: Post-intervention.
